# Supplementary material for: Trace-element behaviour in sediments of Ugandan part of Lake Victoria: results from sequential extraction and chemometrical evaluation
Source: Springer Nature journal article supplement (doi:10.1007/s12665-021-09554-1), 2021-04-01

## Trace element behaviour in sediments of Ugandan part of Lake Victoria – Results from sequential extraction and chemometrical evaluation

Environmental Earth Science

Nils Ribbe, Kenneth Arinaitwe, Tallent Dadi, Kurt Friese, Wolf von Tümpling

Corresponding author: Nils Ribbe, Central Laboratory for Water Analytics and Chemometrics, Helmholtz Centre for Environmental Research – UFZ, Magdeburg, Germany, nils.ribbe@ufz.de

### Supplementary information

**Table S1** Indication of the element concentrations of the quality standards used to verify the calibration of each element, their certified concentrations (NIST 1640a and TMDA-64-3, both natural water standards; all data in  $\mu\text{g/l}$ ; -- : not certified) and the recovery rate (RR) of the corresponding measurement. Both standards had been measured in a tenfold dilution. All elements except Li for the NIST 1640a standard fulfil the required recovery rate of 90–110%. Since the limit of determination for Li is  $0.5 \mu\text{g/l}$ , this is to be expected measuring an effective concentration of  $0.041 \mu\text{g/l}$

**Table S2** Indication of the element contents of the quality sediment standards used to validate the applied method (LGC6187 for pseudototal digestion; BC701 for BCR-extraction), their certified contents (all data in  $\text{mg/kg}$ , except Fe ( $\text{g/kg}$ )) and the recovery rate (RR) of the corresponding method. For the pseudototal digestion, all elements except V and Sn fulfil the required recovery rate of 90–110%. Both element contents though still lie inside the 95% confidence interval published by the company providing the sediment standard (LGC, England). Thus, the used pseudototal digestion method is validated. The BCR701 standard shows six of in total 24 element contents with a RR outside the borders of 90–110%, affecting four different elements. Deviations might have occurred because of less experience with the BCR extraction in comparison with the laboratories participating in the validation of this method. Additionally, four of the six element contents originate from the pseudototal digestion of the residue after the third extraction step, which element contents only are indicative and not certified. Some uncertainty might have come from that as well

**Table S3** Element contents [ $\text{mg/kg}$ ] (except for <sup>a</sup>: [ $\text{g/kg}$ ]) of the elements not listed in table 3 (paper), sediment pH and redox potential  $\Delta E$  [ $\text{mV}$ ] (T corrected) with indication of the Geo-Index  $I_{\text{geo}}$  in brackets (Class 0: 1–1.5X RV; Class 1: 1.5–3X RV; Class 2: 3–6X RV; Class 3: 6–12X RV; Class 4: 12–24X RV; *italics*: RV, **bold**: maximum value, NM: not measured)

**Table S4** Complete indication of the results of the factor analysis using the normalised data containing pseudototal element contents, TP, LOI and the closest distance between shore and the SP (left: factor loadings (positive correlation ( $>0.7$ ): light grey; negative correlation ( $<0.7$ ): dark grey); right: factor scores)

**Table S5** Indication of the fraction percentages (FP [%]; Eq. 1) of each of the studied elements resulting from the BCR-extraction (number indicates the fraction) \*: Irregular data caused by Cu contamination of the 2<sup>nd</sup> fraction of the sequential extraction (as seen in the blanks of the according measurement series as well). After checking, no major influence of these measurement errors on the statistical analyses was detectable though, probably due to a sufficiently big dataset (Figs. 4 a) and S1 a); Tables 5 and S2)

**Table S6** Indication of the summed content (SC [ $\text{mg/kg}$ ] (except for <sup>a</sup>: [ $\text{g/kg}$ ]); eq. 2) of each of the studied elements resulting from the BCR-extraction (nd = not determinable due to demonstrable Cu contamination in 2<sup>nd</sup> fraction) \*: Irregular data caused by Cu contamination of the 2<sup>nd</sup> fraction of the sequential extraction (as seen in the blanks of the according measurement series as well). After checking, no major influence of these measurement errors on the cluster analysis was detectable though, probably due to a sufficiently big dataset (Fig. S1 b))

**Table S7** a) Factor loadings resulting from the factor analysis using the normalised data containing the fraction percentages in each fraction of all of the studied elements (light grey = factor loading  $> 0.7$ , positive correlation; dark grey = factor loading  $< 0.7$ , negative correlation); b) to e) Indication of the associated factor scores for the different samples in each fraction of the sequential extraction

**Fig S1** Cluster analyses of the element composition using Ward's method with the squared Euclidean distance and Z-transformed fraction percentages (a) and summed contents (b)

**Table S1** Indication of the element concentrations of the quality standards used to verify the calibration of each element, their certified concentrations (NIST 1640a and TMDA-64-3, both natural water standards; all data in [ $\mu\text{g/l}$ ]; -- : not certified) and the recovery rate (RR) of the corresponding measurement. Both standards had been measured in a tenfold dilution. All elements except Li for the NIST 1640a standard fulfil the required recovery rate of 90–110%. Since the limit of determination for Li is 0.5  $\mu\text{g/l}$ , this is to be expected measuring an effective concentration of 0.041  $\mu\text{g/l}$

|    | pseudototal digestion |           |        |           |           |        | BCR extraction |           |        |           |           |        |
|----|-----------------------|-----------|--------|-----------|-----------|--------|----------------|-----------|--------|-----------|-----------|--------|
|    | NIST 1640a            |           |        | TMDA-64-3 |           |        | NIST 1640a     |           |        | TMDA-64-3 |           |        |
|    | found                 | certified | RR [%] | found     | certified | RR [%] | found          | certified | RR [%] | found     | certified | RR [%] |
| Li | n.d.                  | 0.41      |        | 157       | 143       | 109.8  | n.d.           | 0.41      |        | 147       | 143       | 102.8  |
| Be | 3.0                   | 3.03      | 99.0   | 143       | 157       | 91.1   | 3.2            | 3.03      | 105.6  | 154       | 157       | 98.1   |
| Mg | 1071                  | 1058.6    | 101.2  | --        | --        | --     | 1069           | 1058.6    | 101.0  | --        | --        | --     |
| Al | 57                    | 53.0      | 107.5  | 304       | 291       | 104.5  | 50             | 53.0      | 94.3   | 281       | 291       | 96.6   |
| Ca | 5756                  | 5615.0    | 102.5  | --        | --        | --     | 5865           | 5615.0    | 104.5  | --        | --        | --     |
| Ti | --                    | --        | --     | 124       | 123       | 100.8  | --             | --        | --     | 123       | 123       | 100.0  |
| V  | 15                    | 15.05     | 99.7   | 288       | 279       | 103.2  | 15             | 15.05     | 99.7   | 286       | 279       | 102.5  |
| Cr | 40                    | 40.54     | 98.7   | 295       | 283       | 104.2  | 41             | 40.54     | 101.1  | 287       | 283       | 101.4  |
| Mn | 39                    | 40.39     | 96.6   | 303       | 292       | 103.8  | 40             | 40.39     | 99.0   | 297       | 292       | 101.7  |
| Fe | 37                    | 36.8      | 100.5  | 320       | 298       | 107.4  | 37             | 36.80     | 100.5  | 307       | 298       | 103.0  |
| Co | 21                    | 20.24     | 103.8  | 260       | 250       | 104.0  | 21             | 20.24     | 103.8  | 253       | 250       | 101.2  |
| Ni | 26                    | 25.32     | 102.7  | 265       | 252       | 105.2  | 25             | 25.32     | 98.7   | 261       | 252       | 103.6  |
| Cu | 91                    | 85.75     | 106.1  | 271       | 261       | 103.8  | 90             | 85.75     | 105.0  | 271       | 261       | 103.8  |
| Zn | 59                    | 55.64     | 106.0  | 331       | 320       | 103.4  | 56             | 55.64     | 100.6  | 325       | 320       | 101.6  |
| As | 7.6                   | 8.08      | 94.1   | 168       | 164       | 102.4  | 8.6            | 8.08      | 106.5  | 168       | 164       | 102.4  |
| Se | 19                    | 20.13     | 94.4   | 158       | 154       | 102.6  | 22             | 20.13     | 109.3  | 157       | 154       | 101.9  |
| Rb | 1.2                   | 1.2       | 100.2  | 31        | 30.9      | 100.3  | 1.2            | 1.2       | 100.2  | 31        | 30.9      | 100.3  |
| Sr | 125                   | 126.03    | 99.2   | 658       | 628       | 104.8  | 126            | 126.03    | 100.0  | 661       | 628       | 105.3  |
| Mo | 46                    | 45.60     | 100.9  | 304       | 286       | 106.3  | 46             | 45.6      | 100.9  | 298       | 286       | 104.2  |
| Cd | 4.1                   | 3.99      | 102.7  | 270       | 258       | 104.7  | 4.1            | 3.99      | 102.7  | 268       | 258       | 103.9  |
| Sn | --                    | --        | --     | 282       | 281       | 100.4  | --             | --        | --     | 284       | 281       | 101.1  |
| Ba | 155                   | 151.8     | 102.1  | 308       | 287       | 107.3  | 154            | 151.8     | 101.4  | 303       | 287       | 105.6  |
| Pb | 12                    | 12.1      | 99.2   | 289       | 280       | 103.2  | 13             | 12.1      | 107.4  | 292       | 280       | 104.3  |

**Table S2** Element contents of the quality sediment standards used to validate the applied method (LGC6187 for pseudototal digestion; BC701 for BCR-extraction), their certified contents (all data in [mg/kg], except Fe ([g/kg])) and the recovery rate (RR) of the corresponding method. For the pseudototal digestion, all elements except V and Sn fulfil the required recovery rate of 90–110%. Both element contents though still lie inside the 95% confidence interval published by the company providing the sediment standard (LGC, England). Thus, the used pseudototal digestion method is validated. The BCR701 standard shows six of in total 24 element contents with a RR outside the borders of 90–110%, affecting four different elements. Deviations might have occurred because of less experience with the BCR extraction in comparison with the laboratories participating in the validation of this method. Additionally, four of the six element contents originate from the pseudototal digestion of the residue after the third extraction step, which element contents only are indicative and not certified. Some uncertainty might have come from that as well

|                         |            | V          | Cr       | Mn        | Fe         | Ni         | Cu         | Zn       | As       | Se        | Cd        | Sn        | Pb         |
|-------------------------|------------|------------|----------|-----------|------------|------------|------------|----------|----------|-----------|-----------|-----------|------------|
| LGC6187                 | found      | 44         | 89       | 1242      | 25         | 36         | 86         | 456      | 26       | 1.1       | 2.8       | 7.7       | 78         |
|                         | certified  | 38.3 ± 6.5 | 84 ± 9.4 | 1240 ± 60 | 23.6 ± 1.5 | 34.7 ± 1.7 | 83.6 ± 4.1 | 439 ± 26 | 24 ± 3.2 | 1.2 ± 0.2 | 2.7 ± 0.3 | 6.8 ± 1.8 | 77.2 ± 4.5 |
|                         | RR [%]     | 114.9      | 106.0    | 100.2     | 106.3      | 103.7      | 102.9      | 103.9    | 108.3    | 91.7      | 103.7     | 113.2     | 101.0      |
|                         |            | Cr         | Ni       | Cu        | Zn         | Cd         | Pb         |          |          |           |           |           |            |
| BCR701 –<br>1. fraction | found      | 2.7        | 15.1     | 48.0      | 216.0      | 7.5        | 3.1        |          |          |           |           |           |            |
|                         | certified  | 2.26       | 15.4     | 49.3      | 205        | 7.34       | 3.18       |          |          |           |           |           |            |
|                         | RR [%]     | 119.5      | 98.1     | 97.4      | 105.4      | 102.2      | 97.5       |          |          |           |           |           |            |
| BCR701 –<br>2. fraction | found      | 47         | 28       | 135       | 116        | 3.7        | 124        |          |          |           |           |           |            |
|                         | certified  | 45.7       | 26.6     | 124       | 114        | 3.77       | 126        |          |          |           |           |           |            |
|                         | RR [%]     | 102.8      | 105.3    | 108.9     | 101.8      | 98.1       | 98.4       |          |          |           |           |           |            |
| BCR701 –<br>3. fraction | found      | 137        | 16       | 67        | 46         | 0.26       | 10         |          |          |           |           |           |            |
|                         | certified  | 143        | 15.3     | 55.2      | 45.7       | 0.27       | 9.3        |          |          |           |           |           |            |
|                         | RR [%]     | 95.8       | 104.6    | 121.4     | 100.7      | 96.3       | 107.5      |          |          |           |           |           |            |
| BCR701 –<br>4. fraction | found      | 75         | 37       | 34        | 96         | 0.12       | 13         |          |          |           |           |           |            |
|                         | indicative | 62.5       | 41.4     | 38.5      | 95         | 0.13       | 11         |          |          |           |           |           |            |
|                         | RR [%]     | 120.0      | 89.4     | 88.3      | 101.1      | 92.3       | 118.2      |          |          |           |           |           |            |

**Table S3** Indication of the element contents [mg/kg] (except for <sup>a</sup>: [g/kg]) of the elements not listed in table 3 (paper), sediment pH and redox potential ΔE [mV] (T corrected) with indication of the Geo-Index I<sub>geo</sub> in brackets (Class 0: 1–1.5X RV; Class 1: 1.5–3X RV; Class 2: 3–6X RV; Class 3: 6–12X RV; Class 4: 12–24X RV; *italics*: RV, **bold**: maximum value, NM: not measured)

|         | Li      | Be        | Mg <sup>a</sup> | Al <sup>a</sup> | Ca <sup>a</sup> | Ti         | V       | Mn         | Fe <sup>a</sup> | Co       | Se        | Rb      | Sr       | Mo        | Sn        | Ba        | pH  | ΔE |
|---------|---------|-----------|-----------------|-----------------|-----------------|------------|---------|------------|-----------------|----------|-----------|---------|----------|-----------|-----------|-----------|-----|----|
| 1_00-05 | 33 (2)  | 2.2 (1)   | 2.4 (1)         | 49 (1)          | 6.3 (1)         | 602 (1)    | 52 (0)  | 395 (2)    | 32 (0)          | 14 (1)   | 0.5 (1)   | 37 (1)  | 55 (0)   | 1.2 (0)   | 2.3 (1)   | 165 (0)   | NM  | NM |
| 1_10-15 | 37 (2)  | 2.3 (1)   | 2.9 (1)         | 57 (1)          | 3.9 (0)         | 956 (1)    | 57 (1)  | 301 (1)    | 33 (1)          | 16 (1)   | <0.2 (0)  | 42 (1)  | 52 (0)   | 1.4 (0)   | 2.2 (1)   | 168 (0)   | NM  | NM |
| 1_30-36 | 66 (3)  | 4.0 (2)   | 3.5 (1)         | 81 (2)          | 3.0 (0)         | 1007 (1)   | 83 (1)  | 183 (1)    | 39 (1)          | 16 (1)   | 0.4 (1)   | 53 (1)  | 46 (0)   | 3.8 (2)   | 2.8 (1)   | 163 (0)   | NM  | NM |
| 2_00-05 | 13 (0)  | 1.3 (0)   | 2.7 (1)         | 34 (0)          | 4.6 (1)         | 906 (1)    | 42 (0)  | 550 (2)    | 40 (1)          | 12 (0)   | 1.0 (2)   | 34 (1)  | 73 (1)   | 2.0 (1)   | 2.2 (1)   | 271 (1)   | 7.2 | 61 |
| 2_10-15 | 20 (1)  | 2.5 (1)   | 3.2 (1)         | 46 (1)          | 4.2 (0)         | 979 (1)    | 65 (1)  | 804 (3)    | 48 (1)          | 14 (1)   | 1.6 (3)   | 42 (1)  | 77 (1)   | 2.7 (1)   | 2.1 (0)   | 245 (1)   | 6   | 57 |
| 3_00-05 | 12 (0)  | 1.8 (1)   | 2.9 (1)         | 27 (0)          | 3.6 (0)         | 611 (1)    | 35 (0)  | 1331 (4)   | 34 (1)          | 8.3 (0)  | 1.5 (3)   | 37 (1)  | 65 (0)   | 1.0 (0)   | 3.1 (1)   | 251 (1)   | 7   | 41 |
| 3_10-15 | 12 (0)  | 2.0 (1)   | 3.1 (1)         | 32 (0)          | 3.8 (0)         | 1064 (1)   | 49 (0)  | 1224 (3)   | 34 (1)          | 9.5 (0)  | 0.3 (0)   | 40 (1)  | 70 (1)   | 1.0 (0)   | 1.4 (0)   | 230 (1)   | 6.8 | 49 |
| 3_24-30 | 12 (0)  | 2.3 (1)   | 2.9 (1)         | 25 (0)          | 3.4 (0)         | 391 (0)    | 39 (0)  | 1107 (3)   | 29 (0)          | 9.1 (0)  | 0.4 (1)   | 34 (1)  | 63 (0)   | 1.1 (0)   | 1.6 (0)   | 185 (0)   | 6.7 | 30 |
| 4_00-05 | 13 (0)  | 1.4 (0)   | 1.9 (0)         | 39 (1)          | 9.4 (2)         | 629 (1)    | 69 (1)  | 248 (1)    | 34 (1)          | 11 (0)   | 1.8 (3)   | 26 (0)  | 109 (1)  | 3.8 (2)   | 2.1 (0)   | 207 (1)   | 7   | 41 |
| 4_10-15 | 15 (0)  | 1.7 (1)   | 1.9 (0)         | 34 (0)          | 3.8 (0)         | 693 (1)    | 76 (1)  | 170 (1)    | 30 (0)          | 12 (0)   | 1.7 (3)   | 24 (0)  | 64 (0)   | 3.5 (2)   | 1.8 (0)   | 148 (0)   | 6.8 | 49 |
| 4_32-38 | 14 (0)  | 1.7 (1)   | 1.6 (0)         | 27 (0)          | 3.1 (0)         | 425 (0)    | 78 (1)  | 132 (0)    | 29 (0)          | 13 (1)   | 1.0 (2)   | 21 (0)  | 50 (0)   | 3.4 (2)   | 2.8 (1)   | 125 (0)   | 6.7 | 30 |
| 5_00-05 | 14 (0)  | 1.3 (0)   | 2.0 (0)         | 37 (0)          | 4.2 (0)         | 816 (1)    | 76 (1)  | 166 (1)    | 23 (0)          | 9.9 (0)  | 0.9 (2)   | 22 (0)  | 76 (1)   | 3.4 (2)   | 1.5 (0)   | 167 (0)   | NM  | NM |
| 5_10-15 | 15 (0)  | 1.2 (0)   | 1.6 (0)         | 40 (1)          | 2.9 (0)         | 807 (1)    | 73 (1)  | 109 (0)    | 21 (0)          | 11 (0)   | 0.6 (1)   | 23 (0)  | 57 (0)   | 4.5 (2)   | 1.7 (0)   | 130 (0)   | NM  | NM |
| 6_00-05 | 15 (0)  | 1.2 (0)   | 1.8 (0)         | 42 (1)          | 4.8 (1)         | 938 (1)    | 74 (1)  | 202 (1)    | 28 (0)          | 11 (0)   | 0.9 (2)   | 26 (0)  | 74 (1)   | 3.1 (2)   | 1.8 (0)   | 164 (0)   | NM  | NM |
| 6_10-15 | 14 (0)  | 1.3 (0)   | 1.5 (0)         | 39 (1)          | 3.0 (0)         | 905 (1)    | 69 (1)  | 134 (0)    | 23 (0)          | 9.5 (0)  | 0.4 (1)   | 24 (0)  | 51 (0)   | 3.1 (2)   | 1.6 (0)   | 128 (0)   | NM  | NM |
| 7_00-05 | 13 (0)  | 1.0 (0)   | 1.8 (0)         | 42 (1)          | 4.5 (1)         | 1109 (1)   | 75 (1)  | 247 (1)    | 38 (1)          | 13 (1)   | 0.5 (1)   | 21 (0)  | 80 (1)   | 4.8 (2)   | 1.7 (0)   | 169 (0)   | NM  | NM |
| 7_05-10 | 11 (0)  | 0.9 (0)   | 1.7 (0)         | 37 (0)          | 4.5 (1)         | 1159 (1)   | 65 (1)  | 230 (1)    | 38 (1)          | 12 (0)   | 0.8 (2)   | 22 (0)  | 72 (1)   | 3.8 (2)   | 1.8 (0)   | 175 (0)   | NM  | NM |
| 7_10-15 | 17 (1)  | 1.6 (1)   | 1.8 (0)         | 46 (1)          | 4.6 (1)         | 1329 (2)   | 89 (1)  | 266 (1)    | 39 (1)          | 15 (1)   | 0.6 (1)   | 22 (0)  | 72 (1)   | 4.1 (2)   | 1.7 (0)   | 157 (0)   | NM  | NM |
| Range   | 11 - 66 | 0.9 - 4.0 | 1.5 - 3.5       | 25 - 81         | 2.9 - 9.4       | 391 - 1329 | 35 - 89 | 109 - 1331 | 21 - 48         | 8.3 - 16 | 0.2 - 1.8 | 21 - 53 | 46 - 109 | 1.0 - 4.8 | 1.4 - 3.1 | 125 - 271 |     |    |
| Mean    | 19      | 1.8       | 2284            | 40728           | 4313            | 851        | 65      | 433        | 32808           | 12       | 0.9       | 31      | 67       | 2.9       | 2.0       | 181       |     |    |
| Median  | 14      | 1.7       | 1979            | 39034           | 4056            | 905        | 69      | 248        | 33301           | 12       | 0.8       | 26      | 68       | 3.2       | 1.8       | 167       |     |    |

legend

Class 0 Class 1 Class 2 Class 3 Class 4 (I geo)

**Table S4** Complete indication of the results of the factor analysis using the normalised data containing pseudototal element contents, TP, LOI and the closest distance between shore and the SP (left: factor loadings (positive correlation (> 0.7): light grey; negative correlation (< -0.7): dark grey); right: factor scores)

|          | F1    | F2    | F3    |         | F1    | F2    | F3    |
|----------|-------|-------|-------|---------|-------|-------|-------|
| Li       | -0.19 | 0.92  | -0.24 | 1_00-05 | 0.22  | 0.68  | -1.25 |
| Be       | 0.27  | 0.84  | -0.16 | 1_10-15 | -0.06 | 1.39  | -1.22 |
| Mg       | 0.66  | 0.71  | 0.13  | 1_30-36 | -0.68 | 3.15  | -0.18 |
| Al       | -0.43 | 0.86  | 0.00  | 2_00-05 | 0.80  | 0.02  | 1.20  |
| Ca       | -0.08 | -0.11 | 0.51  | 2_10-15 | 0.70  | 0.77  | 1.74  |
| Ti       | -0.48 | 0.29  | 0.42  | 3_00-05 | 1.98  | -0.11 | 0.15  |
| V        | -0.89 | 0.03  | 0.05  | 3_10-15 | 1.48  | 0.02  | -0.05 |
| Cr       | -0.96 | 0.15  | 0.08  | 3_24-30 | 2.00  | -0.48 | -0.71 |
| Mn       | 0.92  | 0.05  | 0.15  | 4_00-05 | -0.17 | -0.66 | 1.75  |
| Fe       | 0.10  | 0.54  | 0.69  | 4_10-15 | -0.40 | -0.62 | -0.43 |
| Co       | -0.50 | 0.79  | -0.02 | 4_32-38 | -0.40 | -0.71 | -1.31 |
| Ni       | -0.38 | 0.83  | 0.01  | 5_00-05 | -0.38 | -0.94 | -0.17 |
| Cu       | -0.60 | 0.03  | 0.33  | 5_10-15 | -0.74 | -0.89 | -0.94 |
| Zn       | 0.29  | 0.65  | 0.44  | 6_00-05 | -0.57 | -0.54 | 0.16  |
| As       | -0.29 | -0.25 | 0.70  | 6_10-15 | -0.54 | -0.68 | -1.08 |
| Se       | 0.13  | -0.30 | 0.53  | 7_00-05 | -1.01 | -0.13 | 0.73  |
| Rb       | 0.50  | 0.84  | -0.01 | 7_05-10 | -0.87 | -0.28 | 0.74  |
| Sr       | 0.01  | -0.37 | 0.81  | 7_10-15 | -1.35 | 0.03  | 0.88  |
| Mo       | -0.85 | -0.16 | 0.25  |         |       |       |       |
| Cd       | 0.48  | -0.29 | 0.36  |         |       |       |       |
| Sn       | 0.19  | 0.49  | -0.05 |         |       |       |       |
| Ba       | 0.69  | 0.14  | 0.64  |         |       |       |       |
| Pb       | -0.56 | -0.35 | 0.65  |         |       |       |       |
| LOI      | -0.32 | -0.84 | 0.32  |         |       |       |       |
| TP       | 0.49  | -0.52 | 0.38  |         |       |       |       |
| distance | 0.91  | -0.08 | 0.01  |         |       |       |       |

**Table S5** Indication of the fraction percentages (FP [%]; Eq. 1) of each of the studied elements resulting from the BCR-extraction (number indicates the fraction) \*: Irregular data caused by Cu contamination of the 2<sup>nd</sup> fraction of the sequential extraction (as seen in the blanks of the according measurement series as well). After checking, no major influence of these measurement errors on the statistical analyses was detectable though, probably due to a sufficiently big dataset (Figs. 4 a) and S1 a); Tables 5 and S2)

|                | As.1 | As.2 | As.3 | As.4 | Cd.1 | Cd.2 | Cd.3 | Cd.4 | Co.1 | Co.2 | Co.3 | Co.4 | Cr.1 | Cr.2 | Cr.3 | Cr.4 | Cu.1 | Cu.2 | Cu.3 | Cu.4 | Ni.1 | Ni.2 | Ni.3 | Ni.4 |
|----------------|------|------|------|------|------|------|------|------|------|------|------|------|------|------|------|------|------|------|------|------|------|------|------|------|
| <b>1_00-05</b> | 1    | 3    | 22   | 73   | 38   | 41   | 10   | 11   | 10   | 10   | 37   | 43   | 0    | 6    | 20   | 73   | 0    | 36   | 18   | 46   | 5    | 6    | 19   | 70   |
| <b>1_10-15</b> | 2    | 4    | 26   | 69   | 58   | 42   | 0    | 0    | 11   | 10   | 40   | 39   | 0    | 6    | 26   | 68   | 0    | 36   | 28   | 36   | 7    | 8    | 23   | 61   |
| <b>1_30-36</b> | 1    | 11   | 20   | 68   | 48   | 31   | 17   | 4    | 14   | 9    | 37   | 40   | 0    | 2    | 29   | 69   | 0    | 32   | 41   | 27   | 12   | 10   | 21   | 57   |
| <b>2_00-05</b> | 0    | 6    | 46   | 47   | 42   | 46   | 5    | 7    | 11   | 7    | 38   | 45   | 1    | 5    | 26   | 68   | 0*   | 41*  | 24*  | 35*  | 4    | 6    | 30   | 60   |
| <b>2_10-15</b> | 0    | 3    | 55   | 42   | 44   | 43   | 4    | 9    | 10   | 5    | 48   | 37   | 0    | 5    | 32   | 63   | 0    | 21   | 30   | 49   | 7    | 6    | 33   | 54   |
| <b>3_00-05</b> | 1    | 4    | 64   | 32   | 41   | 44   | 11   | 4    | 7    | 9    | 35   | 49   | 0    | 2    | 18   | 80   | 0    | 24   | 33   | 44   | 4    | 7    | 27   | 63   |
| <b>3_10-15</b> | 0    | 3    | 55   | 41   | 39   | 42   | 13   | 5    | 8    | 9    | 35   | 48   | 0    | 2    | 24   | 74   | 0    | 27   | 39   | 34   | 5    | 6    | 33   | 56   |
| <b>3_24-30</b> | 0    | 3    | 53   | 44   | 43   | 39   | 10   | 8    | 7    | 8    | 33   | 52   | 0    | 2    | 17   | 81   | 0    | 24   | 23   | 54   | 6    | 6    | 28   | 60   |
| <b>4_10-15</b> | 0    | 8    | 50   | 41   | 46   | 50   | 0    | 3    | 6    | 3    | 61   | 29   | 0    | 2    | 45   | 52   | 0*   | 36*  | 40*  | 24*  | 6    | 6    | 36   | 52   |
| <b>4_32-38</b> | 1    | 4    | 56   | 39   | 53   | 31   | 9    | 7    | 7    | 4    | 63   | 26   | 1    | 3    | 49   | 47   | 0    | 20   | 45   | 35   | 9    | 7    | 37   | 46   |
| <b>5_00-05</b> | 1    | 3    | 45   | 52   | 53   | 31   | 10   | 6    | 7    | 4    | 60   | 30   | 0    | 2    | 42   | 56   | 0    | 20   | 51   | 29   | 7    | 6    | 31   | 56   |
| <b>5_10-15</b> | 2    | 3    | 50   | 45   | 61   | 35   | 4    | 1    | 10   | 4    | 62   | 25   | 0    | 2    | 49   | 49   | 0    | 30   | 50   | 20   | 12   | 6    | 33   | 49   |
| <b>6_00-05</b> | 1    | 1    | 50   | 48   | 41   | 53   | 3    | 3    | 4    | 3    | 62   | 30   | 0    | 2    | 40   | 58   | 0    | 18   | 46   | 37   | 4    | 5    | 27   | 63   |
| <b>6_10-15</b> | 2    | 2    | 50   | 47   | 53   | 36   | 9    | 3    | 10   | 5    | 58   | 27   | 0    | 2    | 47   | 51   | 0    | 22   | 50   | 27   | 8    | 6    | 28   | 57   |
| <b>7_00-05</b> | 2    | 2    | 38   | 59   | 44   | 46   | 3    | 7    | 4    | 3    | 56   | 38   | 0    | 3    | 38   | 59   | 0    | 17   | 54   | 29   | 4    | 4    | 27   | 66   |
| <b>7_05-10</b> | 0    | 6    | 32   | 63   | 41   | 42   | 8    | 9    | 3    | 3    | 60   | 35   | 0    | 2    | 39   | 59   | 0*   | 33*  | 46*  | 20*  | 4    | 4    | 25   | 68   |
| <b>7_10-15</b> | 1    | 1    | 41   | 58   | 45   | 31   | 11   | 13   | 6    | 4    | 59   | 32   | 0    | 3    | 45   | 52   | 0    | 17   | 62   | 21   | 4    | 5    | 30   | 61   |

Table S5 continuation

|                | Pb.1 | Pb.2 | Pb.3 | Pb.4 | Zn.1 | Zn.2 | Zn.3 | Zn.4 | Li.1 | Li.2 | Li.3 | Li.4 | Be.1 | Be.2 | Be.3 | Be.4 | Mg.1 | Mg.2 | Mg.3 | Mg.4 | Al.1 | Al.2 | Al.3 | Al.4 |
|----------------|------|------|------|------|------|------|------|------|------|------|------|------|------|------|------|------|------|------|------|------|------|------|------|------|
| <b>1_00-05</b> | 1    | 56   | 14   | 29   | 11   | 17   | 8    | 64   | 1    | 1    | 17   | 82   | 18   | 31   | 24   | 28   | 19   | 7    | 12   | 62   | 0    | 3    | 5    | 91   |
| <b>1_10-15</b> | 2    | 55   | 18   | 26   | 10   | 17   | 11   | 63   | 1    | 1    | 14   | 85   | 19   | 24   | 33   | 24   | 17   | 9    | 15   | 59   | 0    | 3    | 7    | 90   |
| <b>1_30-36</b> | 2    | 60   | 17   | 21   | 11   | 16   | 22   | 52   | 1    | 0    | 10   | 89   | 18   | 24   | 34   | 24   | 14   | 8    | 18   | 61   | 0    | 1    | 6    | 93   |
| <b>2_00-05</b> | 1    | 48   | 11   | 40   | 14   | 24   | 9    | 54   | 1    | 1    | 16   | 82   | 25   | 36   | 20   | 19   | 22   | 6    | 12   | 60   | 0    | 4    | 5    | 90   |
| <b>2_10-15</b> | 1    | 35   | 19   | 44   | 14   | 18   | 11   | 57   | 1    | 0    | 14   | 84   | 17   | 23   | 31   | 29   | 19   | 6    | 15   | 60   | 0    | 3    | 8    | 89   |
| <b>3_00-05</b> | 1    | 53   | 21   | 24   | 10   | 26   | 14   | 50   | 1    | 1    | 18   | 80   | 19   | 28   | 22   | 32   | 18   | 8    | 17   | 57   | 0    | 3    | 12   | 85   |
| <b>3_10-15</b> | 2    | 51   | 22   | 25   | 7    | 20   | 15   | 57   | 1    | 1    | 14   | 84   | 18   | 27   | 25   | 29   | 16   | 8    | 19   | 58   | 0    | 3    | 13   | 84   |
| <b>3_24-30</b> | 1    | 47   | 19   | 33   | 7    | 18   | 10   | 64   | 1    | 0    | 14   | 85   | 12   | 20   | 34   | 33   | 15   | 8    | 13   | 65   | 0    | 2    | 9    | 89   |
| <b>4_10-15</b> | 1    | 37   | 16   | 46   | 20   | 21   | 13   | 47   | 0    | 0    | 15   | 84   | 21   | 43   | 18   | 17   | 27   | 7    | 17   | 49   | 0    | 3    | 8    | 89   |
| <b>4_32-38</b> | 1    | 32   | 21   | 47   | 19   | 18   | 11   | 52   | 1    | 0    | 14   | 85   | 17   | 22   | 31   | 30   | 19   | 6    | 21   | 54   | 0    | 3    | 9    | 88   |
| <b>5_00-05</b> | 2    | 49   | 21   | 28   | 27   | 22   | 13   | 38   | 1    | 1    | 21   | 77   | 16   | 30   | 24   | 30   | 34   | 7    | 19   | 39   | 1    | 6    | 10   | 83   |
| <b>5_10-15</b> | 2    | 41   | 21   | 36   | 27   | 19   | 13   | 40   | 1    | 1    | 24   | 74   | 20   | 27   | 26   | 27   | 29   | 6    | 21   | 44   | 1    | 5    | 13   | 81   |
| <b>6_00-05</b> | 1    | 49   | 18   | 32   | 27   | 22   | 10   | 41   | 1    | 1    | 23   | 76   | 15   | 29   | 24   | 33   | 30   | 7    | 16   | 46   | 0    | 4    | 8    | 88   |
| <b>6_10-15</b> | 2    | 49   | 18   | 31   | 16   | 14   | 25   | 44   | 1    | 0    | 19   | 80   | 23   | 27   | 22   | 28   | 25   | 6    | 19   | 50   | 0    | 5    | 10   | 85   |
| <b>7_00-05</b> | 2    | 50   | 22   | 26   | 27   | 21   | 13   | 39   | 1    | 1    | 23   | 75   | 16   | 22   | 21   | 40   | 35   | 7    | 17   | 41   | 0    | 3    | 9    | 87   |
| <b>7_05-10</b> | 1    | 55   | 16   | 28   | 31   | 22   | 11   | 36   | 2    | 1    | 21   | 76   | 9    | 34   | 20   | 37   | 35   | 6    | 15   | 45   | 0    | 4    | 8    | 88   |
| <b>7_10-15</b> | 1    | 51   | 22   | 26   | 21   | 21   | 14   | 44   | 1    | 1    | 21   | 77   | 13   | 32   | 22   | 33   | 28   | 6    | 21   | 44   | 0    | 3    | 10   | 86   |

Table S5 continuation

|                | Ca.1 | Ca.2 | Ca.3 | Ca.4 | Ti.1 | Ti.2 | Ti.3 | Ti.4 | V.1 | V.2 | V.3 | V.4 | Mn.1 | Mn.2 | Mn.3 | Mn.4 | Fe.1 | Fe.2 | Fe.3 | Fe.4 | Rb.1 | Rb.2 | Rb.3 | Rb.4 |
|----------------|------|------|------|------|------|------|------|------|-----|-----|-----|-----|------|------|------|------|------|------|------|------|------|------|------|------|
| <b>1_00-05</b> | 73   | 20   | 1    | 6    | 0    | 0    | 5    | 95   | 1   | 42  | 13  | 44  | 44   | 32   | 7    | 16   | 1    | 30   | 9    | 60   | 2    | 4    | 4    | 90   |
| <b>1_10-15</b> | 62   | 28   | 4    | 6    | 0    | 0    | 4    | 96   | 1   | 41  | 13  | 45  | 33   | 35   | 9    | 22   | 1    | 26   | 13   | 59   | 2    | 4    | 7    | 87   |
| <b>1_30-36</b> | 62   | 31   | 2    | 5    | 0    | 0    | 0    | 99   | 2   | 38  | 15  | 44  | 36   | 22   | 11   | 31   | 2    | 14   | 26   | 58   | 2    | 3    | 5    | 90   |
| <b>2_00-05</b> | 68   | 24   | 4    | 4    | 0    | 0    | 7    | 93   | 0   | 38  | 16  | 46  | 52   | 25   | 7    | 16   | 0    | 29   | 14   | 57   | 2    | 5    | 5    | 88   |
| <b>2_10-15</b> | 65   | 24   | 5    | 7    | 0    | 0    | 6    | 94   | 1   | 36  | 20  | 44  | 51   | 28   | 9    | 11   | 1    | 32   | 19   | 48   | 2    | 4    | 7    | 87   |
| <b>3_00-05</b> | 55   | 30   | 5    | 10   | 0    | 0    | 1    | 99   | 0   | 25  | 19  | 56  | 48   | 38   | 6    | 7    | 0    | 25   | 15   | 60   | 3    | 6    | 14   | 77   |
| <b>3_10-15</b> | 54   | 31   | 6    | 9    | 0    | 0    | 1    | 99   | 0   | 23  | 21  | 56  | 51   | 34   | 7    | 8    | 0    | 19   | 17   | 63   | 3    | 6    | 17   | 74   |
| <b>3_24-30</b> | 50   | 30   | 7    | 12   | 0    | 0    | 7    | 93   | 0   | 22  | 18  | 60  | 52   | 34   | 5    | 9    | 0    | 18   | 13   | 69   | 2    | 4    | 9    | 84   |
| <b>4_10-15</b> | 66   | 25   | 5    | 4    | 0    | 0    | 6    | 94   | 2   | 47  | 20  | 31  | 33   | 17   | 14   | 36   | 1    | 21   | 20   | 57   | 3    | 3    | 7    | 87   |
| <b>4_32-38</b> | 63   | 26   | 6    | 5    | 0    | 0    | 8    | 91   | 1   | 49  | 24  | 26  | 35   | 17   | 15   | 33   | 2    | 28   | 22   | 48   | 2    | 3    | 10   | 85   |
| <b>5_00-05</b> | 70   | 22   | 4    | 5    | 0    | 0    | 4    | 96   | 2   | 41  | 25  | 31  | 47   | 16   | 9    | 29   | 1    | 15   | 16   | 68   | 4    | 4    | 11   | 81   |
| <b>5_10-15</b> | 69   | 21   | 4    | 6    | 0    | 0    | 11   | 88   | 5   | 43  | 25  | 27  | 40   | 12   | 11   | 37   | 2    | 13   | 27   | 59   | 3    | 4    | 11   | 83   |
| <b>6_00-05</b> | 71   | 23   | 2    | 4    | 0    | 0    | 31   | 69   | 2   | 37  | 23  | 38  | 47   | 18   | 6    | 29   | 1    | 19   | 10   | 70   | 2    | 4    | 6    | 88   |
| <b>6_10-15</b> | 70   | 23   | 3    | 3    | 0    | 0    | 6    | 94   | 3   | 43  | 22  | 32  | 42   | 14   | 7    | 37   | 2    | 19   | 14   | 65   | 2    | 3    | 7    | 88   |
| <b>7_00-05</b> | 69   | 20   | 3    | 7    | 0    | 0    | 1    | 98   | 1   | 27  | 23  | 49  | 24   | 15   | 11   | 50   | 1    | 17   | 13   | 68   | 3    | 4    | 10   | 82   |
| <b>7_05-10</b> | 72   | 19   | 4    | 5    | 0    | 0    | 5    | 94   | 1   | 34  | 19  | 46  | 20   | 15   | 11   | 54   | 1    | 16   | 8    | 75   | 3    | 4    | 6    | 86   |
| <b>7_10-15</b> | 66   | 21   | 4    | 9    | 0    | 0    | 3    | 97   | 1   | 34  | 25  | 40  | 21   | 18   | 11   | 50   | 1    | 17   | 16   | 66   | 3    | 4    | 11   | 82   |



Table S5 continuation

|                | Sr.1 | Sr.2 | Sr.3 | Sr.4 | Se.1 | Se.2 | Se.3 | Se.4 | Mo.1 | Mo.2 | Mo.3 | Mo.4 | Sn.1 | Sn.2 | Sn.3 | Sn.4 | Ba.1 | Ba.2 | Ba.3 | Ba.4 |
|----------------|------|------|------|------|------|------|------|------|------|------|------|------|------|------|------|------|------|------|------|------|
| <b>1_00-05</b> | 68   | 20   | 2    | 10   | 1    | 1    | 91   | 7    | 0    | 1    | 53   | 46   | 0    | 0    | 0    | 100  | 34   | 41   | 5    | 21   |
| <b>1_10-15</b> | 57   | 26   | 3    | 14   | 1    | 4    | 87   | 8    | 0    | 1    | 41   | 58   | 0    | 0    | 0    | 100  | 25   | 45   | 7    | 23   |
| <b>1_30-36</b> | 51   | 32   | 4    | 13   | 5    | 6    | 83   | 6    | 0    | 1    | 19   | 80   | 0    | 0    | 0    | 100  | 8    | 51   | 9    | 32   |
| <b>2_00-05</b> | 56   | 21   | 4    | 19   | 6    | 4    | 85   | 5    | 0    | 1    | 76   | 23   | 0    | 0    | 0    | 99   | 32   | 39   | 9    | 20   |
| <b>2_10-15</b> | 52   | 21   | 6    | 21   | 0    | 4    | 86   | 9    | 0    | 1    | 64   | 35   | 0    | 0    | 0    | 100  | 23   | 44   | 11   | 22   |
| <b>3_00-05</b> | 50   | 27   | 7    | 16   | 1    | 5    | 80   | 14   | 1    | 2    | 27   | 70   | 0    | 0    | 1    | 99   | 32   | 45   | 11   | 12   |
| <b>3_10-15</b> | 48   | 27   | 7    | 18   | 0    | 3    | 86   | 11   | 1    | 1    | 25   | 73   | 0    | 0    | 1    | 99   | 37   | 37   | 12   | 15   |
| <b>3_24-30</b> | 45   | 28   | 6    | 21   | 0    | 5    | 90   | 5    | 0    | 1    | 46   | 52   | 0    | 0    | 0    | 100  | 34   | 38   | 9    | 19   |
| <b>4_10-15</b> | 50   | 20   | 5    | 26   | 2    | 3    | 95   | 1    | 0    | 1    | 52   | 47   | 0    | 0    | 1    | 99   | 14   | 42   | 12   | 33   |
| <b>4_32-38</b> | 44   | 20   | 6    | 30   | 1    | 2    | 90   | 7    | 1    | 1    | 52   | 46   | 0    | 0    | 0    | 100  | 22   | 33   | 12   | 33   |
| <b>5_00-05</b> | 62   | 18   | 4    | 16   | 0    | 3    | 71   | 26   | 0    | 0    | 38   | 61   | 0    | 0    | 0    | 99   | 33   | 34   | 10   | 23   |
| <b>5_10-15</b> | 60   | 17   | 5    | 18   | 1    | 0    | 88   | 11   | 0    | 1    | 39   | 60   | 0    | 0    | 1    | 99   | 21   | 41   | 13   | 26   |
| <b>6_00-05</b> | 62   | 19   | 3    | 17   | 0    | 0    | 86   | 14   | 0    | 0    | 79   | 21   | 0    | 0    | 0    | 100  | 36   | 32   | 7    | 24   |
| <b>6_10-15</b> | 59   | 19   | 4    | 19   | 0    | 1    | 84   | 15   | 0    | 0    | 74   | 25   | 0    | 0    | 0    | 100  | 36   | 31   | 9    | 24   |
| <b>7_00-05</b> | 59   | 17   | 4    | 20   | 1    | 2    | 76   | 20   | 0    | 0    | 23   | 77   | 0    | 0    | 0    | 99   | 30   | 35   | 10   | 25   |
| <b>7_05-10</b> | 58   | 16   | 3    | 22   | 19   | 7    | 72   | 2    | 0    | 0    | 77   | 23   | 0    | 0    | 0    | 100  | 24   | 40   | 9    | 26   |
| <b>7_10-15</b> | 54   | 17   | 4    | 25   | 0    | 2    | 85   | 12   | 0    | 0    | 27   | 73   | 0    | 0    | 0    | 99   | 22   | 37   | 12   | 29   |

**Table S6** Indication of the summed content (SC [mg/kg] (except for <sup>a</sup>: [g/kg]); eq. 2) of each of the studied elements resulting from the BCR-extraction (nd = not determinable due to demonstrable Cu contamination in 2<sup>nd</sup> fraction) <sup>\*</sup>: Irregular data caused by Cu contamination of the 2<sup>nd</sup> fraction of the sequential extraction (as seen in the blanks of the according measurement series as well). After checking, no major influence of these measurement errors on the cluster analysis was detectable though, probably due to a sufficiently big dataset (Fig. S1 b))

|                | As  | Cd   | Co  | Cr | Cu   | Ni | Pb | Zn | Li | Be  | Mg <sup>a</sup> | Al <sup>a</sup> | Ca <sup>a</sup> | Ti   | V  | Mn   | Fe <sup>a</sup> | Rb | Sr | Se  | Mo  | Sn  | Ba  |
|----------------|-----|------|-----|----|------|----|----|----|----|-----|-----------------|-----------------|-----------------|------|----|------|-----------------|----|----|-----|-----|-----|-----|
| <b>1_00-05</b> | 2.6 | 0.06 | 12  | 48 | 26   | 29 | 11 | 58 | 28 | 1.6 | 2.1             | 36              | 6.5             | 554  | 49 | 368  | 28              | 34 | 58 | 0.5 | 1.2 | 2.6 | 148 |
| <b>1_10-15</b> | 2.4 | 0.06 | 14  | 54 | 30   | 32 | 12 | 67 | 32 | 2.0 | 2.6             | 40              | 3.9             | 617  | 53 | 262  | 28              | 38 | 49 | 0.7 | 1.5 | 2.5 | 144 |
| <b>1_30-36</b> | 3.4 | 0.12 | 15  | 64 | 38   | 41 | 15 | 89 | 47 | 2.9 | 2.9             | 55              | 3.0             | 592  | 68 | 164  | 31              | 44 | 41 | 1.2 | 3.2 | 3.3 | 127 |
| <b>2_00-05</b> | 5.7 | 0.22 | 10  | 42 | 96*  | 22 | 17 | 75 | 12 | 1.4 | 2.6             | 29              | 4.7             | 578  | 53 | 516  | 37              | 31 | 72 | 2.0 | 2.0 | 2.1 | 225 |
| <b>2_10-15</b> | 5.8 | 0.23 | 11  | 45 | 32   | 23 | 18 | 83 | 18 | 2.2 | 3.0             | 34              | 4.5             | 716  | 57 | 765  | 42              | 38 | 76 | 2.0 | 2.5 | 2.6 | 222 |
| <b>3_00-05</b> | 3.5 | 0.24 | 8.0 | 36 | 34   | 23 | 14 | 83 | 11 | 1.7 | 3.0             | 24              | 3.9             | 613  | 39 | 1369 | 32              | 33 | 68 | 1.4 | 1.1 | 4.4 | 250 |
| <b>3_10-15</b> | 4.3 | 0.22 | 8.2 | 29 | 36   | 19 | 14 | 76 | 12 | 2.2 | 3.1             | 26              | 3.8             | 699  | 42 | 1235 | 30              | 36 | 67 | 1.4 | 1.1 | 2.5 | 219 |
| <b>3_24-30</b> | 3.1 | 0.24 | 8.4 | 28 | 25   | 18 | 14 | 85 | 13 | 2.3 | 3.0             | 27              | 3.7             | 746  | 40 | 1099 | 29              | 38 | 64 | 1.4 | 1.0 | 2.8 | 183 |
| <b>4_10-15</b> | 4.9 | 0.10 | 11  | 65 | 96*  | 19 | 16 | 59 | 12 | 1.2 | 1.8             | 28              | 4.0             | 533  | 73 | 154  | 28              | 22 | 60 | 1.7 | 3.0 | 2.0 | 134 |
| <b>4_32-38</b> | 4.6 | 0.14 | 12  | 65 | 29   | 19 | 17 | 60 | 13 | 1.6 | 1.6             | 31              | 3.4             | 624  | 79 | 135  | 28              | 24 | 52 | 1.5 | 3.2 | 3.3 | 129 |
| <b>5_00-05</b> | 4.7 | 0.18 | 8.3 | 63 | 39   | 20 | 20 | 62 | 11 | 1.3 | 2.0             | 28              | 4.4             | 625  | 69 | 158  | 19              | 20 | 75 | 1.4 | 3.1 | 2.5 | 157 |
| <b>5_10-15</b> | 5.3 | 0.16 | 9.2 | 64 | 46   | 19 | 15 | 53 | 12 | 1.1 | 1.5             | 25              | 3.2             | 678  | 65 | 96   | 18              | 18 | 55 | 1.2 | 5.2 | 2.3 | 114 |
| <b>6_00-05</b> | 5.2 | 0.15 | 9.6 | 65 | 39   | 21 | 21 | 64 | 13 | 1.1 | 1.8             | 33              | 4.9             | 784  | 62 | 197  | 22              | 24 | 75 | 1.3 | 3.4 | 2.7 | 157 |
| <b>6_10-15</b> | 4.5 | 0.12 | 8.7 | 63 | 39   | 19 | 18 | 51 | 12 | 0.9 | 1.5             | 28              | 3.1             | 703  | 63 | 127  | 19              | 21 | 51 | 1.2 | 3.7 | 2.6 | 123 |
| <b>7_00-05</b> | 4.5 | 0.14 | 12  | 73 | 78   | 24 | 25 | 73 | 14 | 0.9 | 1.9             | 33              | 5.0             | 1027 | 73 | 217  | 33              | 20 | 77 | 1.3 | 3.7 | 2.6 | 156 |
| <b>7_05-10</b> | 4.6 | 0.14 | 11  | 72 | 243* | 22 | 22 | 70 | 11 | 0.6 | 1.5             | 26              | 4.3             | 592  | 74 | 176  | 32              | 17 | 61 | 1.0 | 3.6 | 2.0 | 130 |
| <b>7_10-15</b> | 5.0 | 0.17 | 12  | 78 | 101  | 24 | 23 | 57 | 15 | 1.1 | 1.7             | 33              | 5.0             | 1075 | 80 | 209  | 32              | 19 | 69 | 1.3 | 4.4 | 2.6 | 136 |

**Table S7**

a) Factor loadings resulting from the factor analysis using the normalised data containing the fraction percentages in each fraction of all of the studied elements (light grey = factor loading > 0.7, positive correlation; dark grey = factor loading < 0.7, negative correlation)

b) to e) Indication of the associated factor scores for the different samples in each fraction of the sequential extraction

| a)        | As   | Cd    | Co   | Cr   | Cu   | Ni   | Pb    | Zn    | Li   | Be   | Mg    | Al   | Ca    | Ti   | V    | Mn    | Fe   | Rb   | Sr    | Se    | Mo   | Sn   | Ba    |
|-----------|------|-------|------|------|------|------|-------|-------|------|------|-------|------|-------|------|------|-------|------|------|-------|-------|------|------|-------|
| <b>F1</b> | 0.61 | -0.53 | 0.33 | 0.80 | 0.17 | 0.87 | 0.05  | 0.89  | 0.95 | 0.24 | 0.94  | 0.97 | -0.30 | 0.97 | 0.49 | 0.24  | 0.86 | 0.97 | -0.04 | -0.29 | 0.46 | 0.98 | -0.07 |
| <b>F2</b> | 0.70 | -0.78 | 0.90 | 0.55 | 0.65 | 0.43 | -0.16 | -0.10 | 0.24 | 0.11 | 0.07  | 0.11 | -0.67 | 0.10 | 0.08 | -0.65 | 0.09 | 0.09 | -0.74 | 0.93  | 0.77 | 0.03 | -0.84 |
| <b>F3</b> | 0.15 | -0.17 | 0.03 | 0.18 | 0.63 | 0.15 | 0.94  | 0.19  | 0.16 | 0.72 | -0.18 | 0.20 | -0.64 | 0.16 | 0.81 | -0.34 | 0.45 | 0.19 | -0.63 | -0.04 | 0.05 | 0.17 | 0.34  |

| <b>fraction 1</b> | F1    | F2    | F3    | <b>fraction 2</b> | F1    | F2    | F3   | <b>fraction 3</b> | F1    | F2   | F3    | <b>fraction 4</b> | F1   | F2    | F3    |
|-------------------|-------|-------|-------|-------------------|-------|-------|------|-------------------|-------|------|-------|-------------------|------|-------|-------|
| 1_00-05           | -0.29 | -0.96 | -1.51 | 1_00-05           | -0.75 | -0.88 | 1.59 | 1_00-05           | -0.82 | 1.48 | -0.38 | 1_00-05           | 1.85 | 0.37  | 0.30  |
| 1_10-15           | -0.45 | -0.77 | -1.33 | 1_10-15           | -0.68 | -0.96 | 1.30 | 1_10-15           | -0.75 | 1.43 | -0.02 | 1_10-15           | 1.88 | 0.30  | 0.04  |
| 1_30-36           | -0.45 | -0.41 | -1.53 | 1_30-36           | -0.77 | -0.90 | 1.34 | 1_30-36           | -0.72 | 1.12 | 0.29  | 1_30-36           | 1.94 | 0.19  | -0.10 |
| 2_00-05           | -0.30 | -0.95 | -1.27 | 2_00-05           | -0.76 | -0.82 | 1.62 | 2_00-05           | -0.63 | 1.66 | -0.54 | 2_00-05           | 1.69 | 0.11  | 0.19  |
| 2_10-15           | -0.30 | -0.80 | -1.51 | 2_10-15           | -0.66 | -0.88 | 0.90 | 2_10-15           | -0.58 | 1.61 | -0.02 | 2_10-15           | 1.55 | 0.07  | 0.63  |
| 3_00-05           | -0.39 | -0.85 | -1.27 | 3_00-05           | -0.60 | -1.08 | 1.04 | 3_00-05           | -0.61 | 1.32 | -0.11 | 3_00-05           | 1.60 | 0.60  | 0.34  |
| 3_10-15           | -0.40 | -0.90 | -1.19 | 3_10-15           | -0.68 | -0.87 | 0.89 | 3_10-15           | -0.59 | 1.28 | 0.06  | 3_10-15           | 1.68 | 0.48  | 0.23  |
| 3_24-30           | -0.41 | -0.84 | -1.36 | 3_24-30           | -0.67 | -0.83 | 0.61 | 3_24-30           | -0.71 | 1.38 | 0.04  | 3_24-30           | 1.79 | 0.28  | 0.71  |
| 4_10-15           | -0.33 | -0.61 | -1.43 | 4_10-15           | -0.84 | -0.85 | 1.77 | 4_10-15           | -0.50 | 1.79 | -0.40 | 4_10-15           | 1.66 | -0.33 | 0.06  |
| 4_32-38           | -0.39 | -0.70 | -1.33 | 4_32-38           | -0.70 | -0.60 | 0.87 | 4_32-38           | -0.48 | 1.68 | 0.07  | 4_32-38           | 1.57 | -0.38 | 0.40  |
| 5_00-05           | -0.09 | -1.08 | -1.59 | 5_00-05           | -0.79 | -0.69 | 1.29 | 5_00-05           | -0.56 | 1.56 | 0.09  | 5_00-05           | 1.44 | 0.22  | 0.21  |
| 5_10-15           | -0.23 | -0.63 | -1.72 | 5_10-15           | -0.90 | -0.75 | 1.66 | 5_10-15           | -0.63 | 1.74 | -0.31 | 5_10-15           | 1.76 | -0.36 | 0.37  |
| 6_00-05           | -0.11 | -0.91 | -1.73 | 6_00-05           | -0.79 | -0.91 | 1.25 | 6_00-05           | -0.56 | 1.90 | -0.12 | 6_00-05           | 1.47 | -0.09 | 0.60  |
| 6_10-15           | -0.28 | -1.02 | -1.24 | 6_10-15           | -0.85 | -0.66 | 1.26 | 6_10-15           | -0.49 | 1.80 | -0.14 | 6_10-15           | 1.62 | -0.12 | 0.12  |
| 7_00-05           | -0.22 | -0.73 | -1.57 | 7_00-05           | -0.81 | -0.81 | 1.02 | 7_00-05           | -0.64 | 1.48 | 0.09  | 7_00-05           | 1.67 | 0.06  | 0.46  |
| 7_05-10           | -0.23 | -0.81 | -1.56 | 7_05-10           | -0.91 | -0.63 | 1.55 | 7_05-10           | -0.63 | 1.77 | -0.33 | 7_05-10           | 1.76 | -0.33 | 0.34  |
| 7_10-15           | -0.34 | -0.84 | -1.34 | 7_10-15           | -0.81 | -0.66 | 1.22 | 7_10-15           | -0.59 | 1.61 | 0.10  | 7_10-15           | 1.74 | -0.11 | 0.02  |

b)

c)

d)

e)

**Fig S1** Cluster analyses of the element composition using Ward's method with the squared Euclidean distance and Z-transformed (a) fraction percentages and (b) summed contents

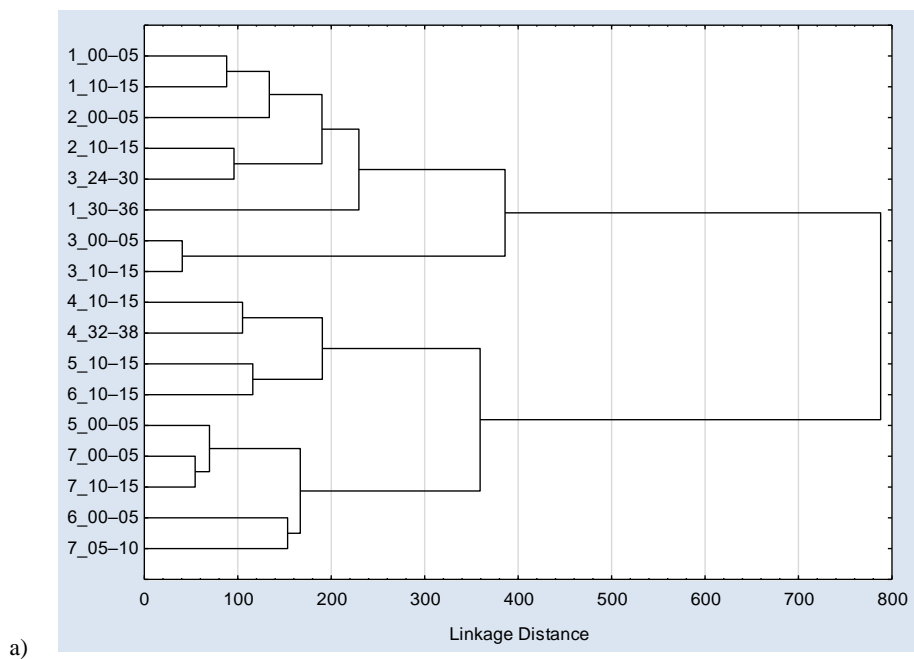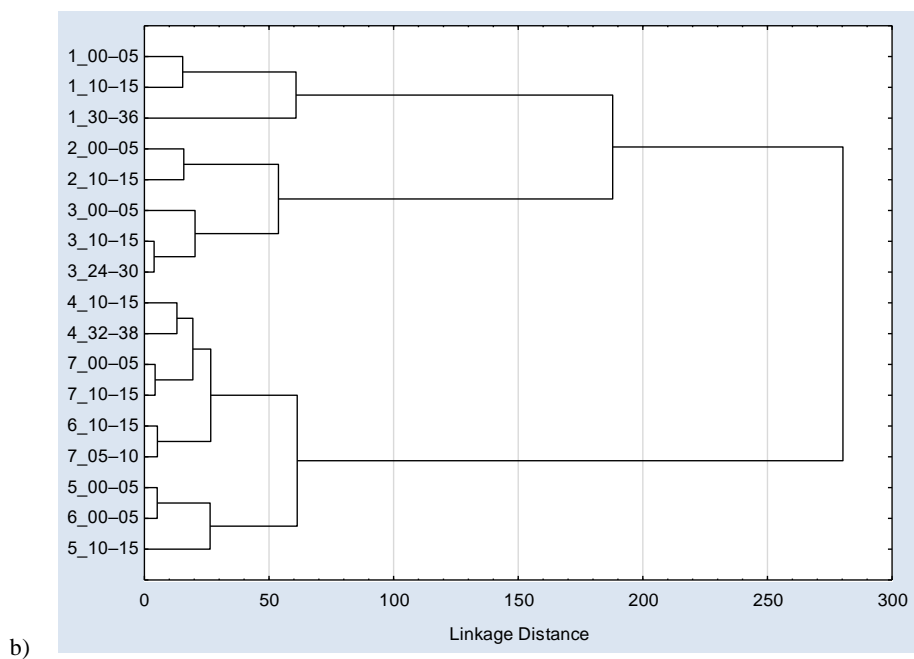

Supplement: MOESM1 [file 19059288]
